# Supplementary material
Source: ML conference proceedings conference paper supplement (https://openaccess.thecvf.com/content/CVPR2022/html/Yu_Towards_Robust_Rain_CVPR_2022_paper.html)
Supplement: Supplementary file 3 [file Yu_Towards_Robust_Rain_CVPR_2022_supplemental.zip]

Archive with 2 entries (2 files):
- 02884-supp.pdf
- __MACOSX/._02884-supp.pdf
